# Supplementary material
Source: publisher figshare collection journal article supplement (https://frontiersin.figshare.com/ndownloader/files/25874754)
Supplement: Supplementary file 1 [file 25874754]

**SUPPLEMENTARY Table 1.**

Number of observed ASV and Chao-1 values when increasing the number of collected algal pieces in our 16S rRNA genes-based analysis.

| **Alga 1** | **1 fragment** | **2 fragments** | **3 fragments** | **4 fragments** |
| --- | --- | --- | --- | --- |
| ASV observed | 432 | 660 | 868 | 1024 |
| Chao-1 | 441.6 | 709.7 | 895.5 | 1069.4 |
| Error Chao-1 | 5.3 | 20.1 | 10.8 | 15.3 |

| **Alga 2** | **1 fragment** | **2 fragments** | **3 fragments** | **4 fragments** |
| --- | --- | --- | --- | --- |
| ASV observed | 438 | 671 | 860 | 1024 |
| Chao-1 | 452.5 | 690.7 | 892.2 | 1062.2 |
| Error Chao-1 | 7.1 | 8.7 | 12.9 | 13.8 |

| **Alga 3** | **1 fragment** | **2 fragments** | **3 fragments** | **4 fragments** |
| --- | --- | --- | --- | --- |
| ASV observed | 435 | 666 | 863 | 1029 |
| Chao-1 | 453.1 | 689.1 | 890.0 | 1070.7 |
| Error Chao-1 | 8.7 | 9.7 | 10.7 | 14.2 |

| **Alga 4** | **1 fragment** | **2 fragments** | **3 fragments** | **4 fragments** |
| --- | --- | --- | --- | --- |
| ASV observed | 439 | 671 | 862 | 1025 |
| Chao-1 | 450.3 | 702.3 | 879.0 | 1098.4 |
| Error Chao-1 | 5.9 | 12.1 | 7.5 | 23.7 |

| **Alga 5** | **1 fragment** | **2 fragments** | **3 fragments** | **4 fragments** |
| --- | --- | --- | --- | --- |
| ASV observed | 441 | 671 | 872 | 1034 |
| Chao-1 | 457.2 | 702.9 | 913.7 | 1086 |
| Error Chao-1 | 8.4 | 12.5 | 15.0 | 16.9 |

**SUPPLEMENTARY Table 2.**

Number of observed ASV and Chao-1 values when increasing the number of collected algal pieces in our ITS genes fragments-based analysis.

**TABLE 2**

| **Alga 1** | **1 fragment** | **2 fragments** | **3 fragments** | **4 fragments** |
| --- | --- | --- | --- | --- |
| ASV observed | 24 | 42 | 55 | 67 |
| Chao-1 | 24 | 42 | 55 | 67 |
| Error Chao-1 | 0 | 0 | 0 | 0 |

| **Alga 2** | **1 fragment** | **2 fragments** | **3 fragments** | **4 fragments** |
| --- | --- | --- | --- | --- |
| ASV observed | 38 | 72 | 76 | 87 |
| Chao-1 | 38 | 72 | 76 | 87 |
| Error Chao-1 | 0 | 0 | 0 | 0 |

| **Alga 3** | **1 fragment** | **2 fragments** | **3 fragments** | **4 fragments** |
| --- | --- | --- | --- | --- |
| ASV observed | 37 | 51 | 54 | 65 |
| Chao-1 | 37 | 51 | 54 | 65 |
| Error Chao-1 | 0 | 0 | 0 | 0 |

| **Alga 4** | **1 fragment** | **2 fragments** | **3 fragments** | **4 fragments** |
| --- | --- | --- | --- | --- |
| ASV observed | 22 | 34 | 45 | 59 |
| Chao-1 | 22 | 34 | 45 | 59 |
| Error Chao-1 | 0 | 0 | 0 | 0 |

| **Alga 5** | **1 fragment** | **2 fragments** | **3 fragments** | **4 fragments** |
| --- | --- | --- | --- | --- |
| ASV observed | 11 | 40 | 64 | 64 |
| Chao-1 | 11 | 40 | 64 | 64 |
| Error Chao-1 | 0 | 0 | 0 | 0 |
